# Supplementary material for: Deep amplicon sequencing for culture-free prediction of susceptibility or resistance to 13 anti-tuberculous drugs
Source: PubMed Central journal article supplement (PMC8174722; doi:10.1183/13993003.02338-2020), 2021-03-18
Supplement: ERJ-02338-2020.Figure_1.pdf [file ERJ-02338-2020.Figure_1.pdf]

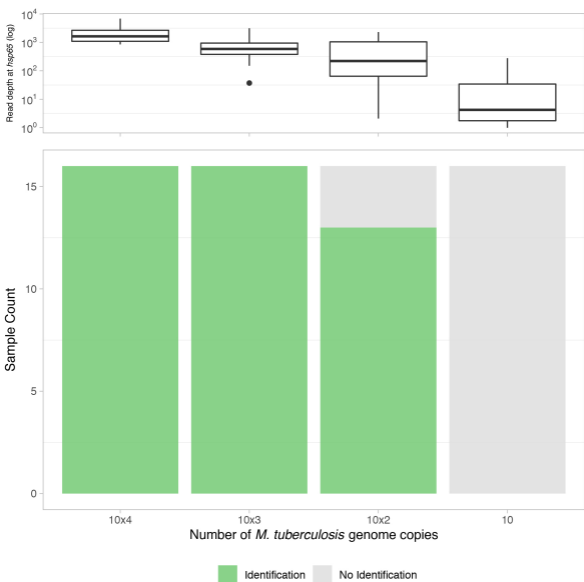

**Supplementary Figure 1.** Limit of detection (LOD) of Deeplex Myc-TB for mycobacterial identification. (Top) Read depth at *hsp65* versus the number of input genomes. Median values as well as 25-75% quartiles are shown. (Bottom) For each dilution level with 10, 10<sup>2</sup>, 10<sup>3</sup>, 10<sup>4</sup> genome copies, LOD was measured as the fraction with (green) or without (grey) correct identification among 16 tests, corresponding to four independent amplification replicates and sequencing rounds of 4 MTBC genomic DNA extracts.
