# Supplementary material for: Deep amplicon sequencing for culture-free prediction of susceptibility or resistance to 13 anti-tuberculous drugs
Source: PubMed Central journal article supplement (PMC8174722; doi:10.1183/13993003.02338-2020), 2021-03-18
Supplement: ERJ-02338-2020.Figure_2.pdf [file ERJ-02338-2020.Figure_2.pdf]

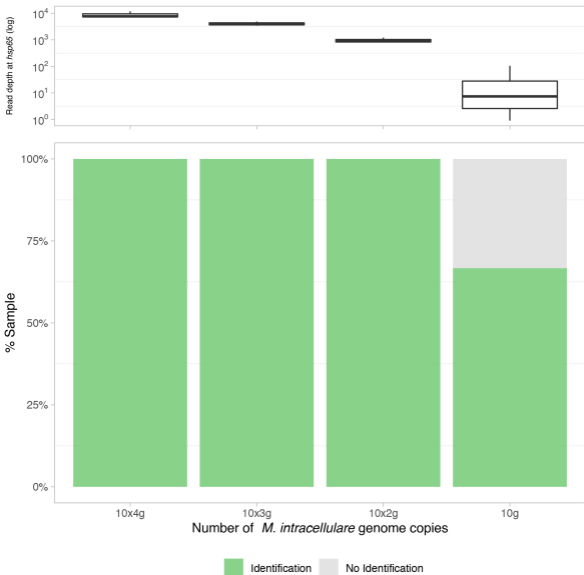

**Supplementary Figure S2.** Limit of detection (LOD) of Deeplex Myc-TB for NTM identification. (Top) Read depth at hsp65 versus the number of input genomes of a *M. intracellulare* strain. Median values as well as 25-75% quartiles are shown. (Bottom) LOD was measured as the fraction with (green) or without (grey) correct identification in three independent replicated analyses of  $10^1$ ,  $10^2$ ,  $10^3$ ,  $10^4$  *M. intracellulare* genome copies.
