# Supplementary material for: Deep amplicon sequencing for culture-free prediction of susceptibility or resistance to 13 anti-tuberculous drugs
Source: PubMed Central journal article supplement (PMC8174722; doi:10.1183/13993003.02338-2020), 2021-03-18
Supplement: ERJ-02338-2020.Figure_3.pdf [file ERJ-02338-2020.Figure_3.pdf]

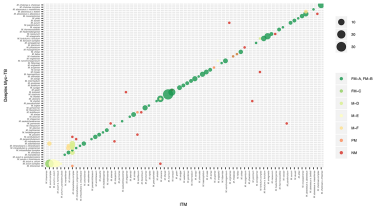

**Supplementary Figure 1.** Identification of non-tuberculous mycobacterial species by *DeepSeq Myco-TB* versus reference identification. *DeepSeq Myco-TB* results were based on *hspX* level match analysis, complemented by specific SNP detection in *IS6110* (*my*) and *23S rDNA* (*ry*) targets for *M. bovis* and *M. tuberculosis* strains, while reference identification was based on *gubA* and/or *IS6110* cDNA target sequencing results, phenotypic profiling and/or type strain status. The number of isolates studied per taxon (complex, species or subspecies) is proportional to associated circle sizes. FM-A, FM-B: Full match at same/taxonomic level (complex, species or subspecies), FM-C: Full match at (sub)species level (with a synonym identified by *DeepSeq*), FM-D: Match at complex level, sublevel provided by *DeepSeq*, FM-E: Match at complex level, sublevel provided by the reference, FM-F: Match at complex level, different subspecies, FM: Partial match, several possible species identified by *DeepSeq*, NM: No match. Non-tuberculous mycobacterial taxa are ordered phylogenetically, according to Forest et al. (2018).
