# Supplementary material for: Deep amplicon sequencing for culture-free prediction of susceptibility or resistance to 13 anti-tuberculous drugs
Source: PubMed Central journal article supplement (PMC8174722; doi:10.1183/13993003.02338-2020), 2021-03-18
Supplement: ERJ-02338-2020.Figure_5.pdf [file ERJ-02338-2020.Figure_5.pdf]

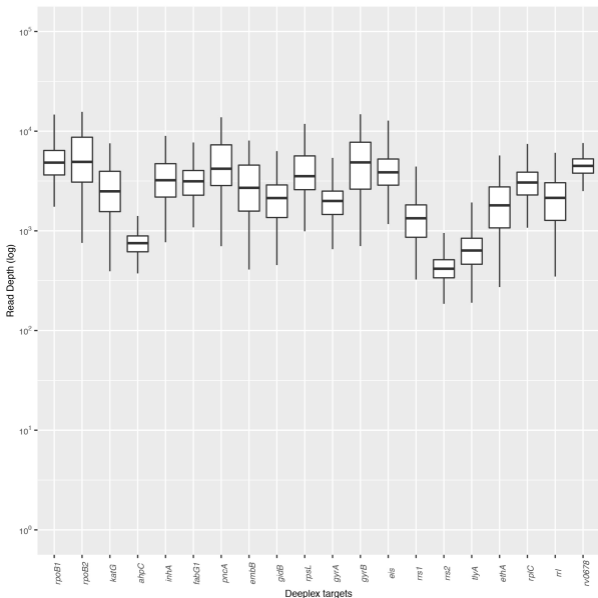

**Supplementary Figure S5.** Log read depth obtained at drug resistance-associated Deeplex Myc-TB targets in 429 DNA strain samples from the TDR and the Sciensano-Belgian National TB Reference Center collections.

Median values as well as 25-75% quartiles are shown.
