# Supplementary material for: Deep amplicon sequencing for culture-free prediction of susceptibility or resistance to 13 anti-tuberculous drugs
Source: PubMed Central journal article supplement (PMC8174722; doi:10.1183/13993003.02338-2020), 2021-03-18
Supplement: ERJ-02338-2020.Figure_6.pdf [file ERJ-02338-2020.Figure_6.pdf]

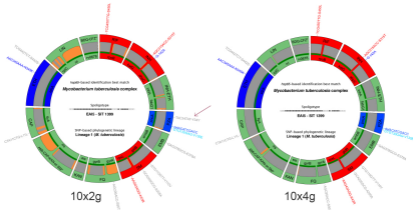

**Supplementary Figure S6.** Deeplex Myc-TB results obtained using  $10^2$  versus  $10^4$  *M. tuberculosis* genome copies of sample TB-TDR0014 from the TDR collection. A red arrow indicates an erratically detected false positive synonymous low frequency variant (5.2%) *prnCA* Y34Y at  $10^2$  genomes. This variant was detected only in this experiment. This likely reflects very sporadic emergence over filtered noise level of low frequency amplification errors, sometimes seen with  $10^1$  or  $10^2$  genome copies.
