# Supplementary material for: Deep amplicon sequencing for culture-free prediction of susceptibility or resistance to 13 anti-tuberculous drugs
Source: PubMed Central journal article supplement (PMC8174722; doi:10.1183/13993003.02338-2020), 2021-03-18
Supplement: ERJ-02338-2020.Shareable.pdf [file ERJ-02338-2020.Shareable.pdf]

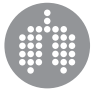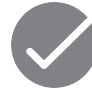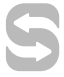

SHAREABLE PDF

# Deep amplicon sequencing for culture-free prediction of susceptibility or resistance to 13 anti-tuberculous drugs

Agathe Jouet<sup>1,12</sup>, Cyril Gaudin<sup>1,12</sup>, Nelly Badalato <sup>1</sup>, Caroline Allix-Béguet<sup>1</sup>, Stéphanie Duthoy<sup>1</sup>, Alice Ferré<sup>1</sup>, Maren Diels<sup>2</sup>, Yannick Laurent<sup>1</sup>, Sandy Contreras<sup>1</sup>, Silke Feuerriegel<sup>3,4</sup>, Stefan Niemann<sup>3,4</sup>, Emmanuel André<sup>5</sup>, Michel K. Kaswa<sup>6</sup>, Elisa Tagliani <sup>7</sup>, Andrea Cabibbe <sup>7</sup>, Vanessa Mathys<sup>8</sup>, Daniela Cirillo <sup>7</sup>, Bouke C. de Jong <sup>9</sup>, Leen Rigouts<sup>9,10</sup> and Philip Supply <sup>11</sup>

**Affiliations:** <sup>1</sup>GenoScreen, Lille, France. <sup>2</sup>BCCM/ITM, Mycobacteria Collection, Institute of Tropical Medicine, Antwerp, Belgium. <sup>3</sup>Molecular and Experimental Mycobacteriology, Research Center Borstel, Borstel, Germany. <sup>4</sup>German Center for Infection Research (DZIF), Partner Site Hamburg-Lübeck-Borstel, Borstel, Germany. <sup>5</sup>Laboratory of Clinical Bacteriology and Mycology, Dept of Microbiology and Immunology, KU Leuven, Leuven, Belgium. <sup>6</sup>National Tuberculosis Program, Kinshasa, Democratic Republic of the Congo. <sup>7</sup>Emerging Bacterial Pathogens, IRCCS San Raffaele Scientific Institute, Milan, Italy. <sup>8</sup>Unit Bacterial Diseases Service, Infectious Diseases in Humans, Sciensano, Brussels, Belgium. <sup>9</sup>Mycobacteriology Unit, Dept of Biomedical Sciences, Institute of Tropical Medicine, Antwerp, Belgium. <sup>10</sup>Dept of Biomedical Sciences, Antwerp University, Antwerp, Belgium. <sup>11</sup>Université de Lille, CNRS, INSERM, CHU Lille, Institut Pasteur de Lille, U1019-UMR 8204-CIIL (Center for Infection and Immunity of Lille), Lille, France. <sup>12</sup>These authors contributed equally to this work.

**Correspondence:** Philip Supply, Institut Pasteur de Lille, U1019-UMR 8204-CIIL (Center for Infection and Immunity of Lille), 1 Rue du Prof Calmette, 59000 Lille, France. E-mail: philip.supply@ibl.cnrs.fr

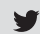

@ERSpublications

The novel Deeplex Myc-TB molecular assay shows a high degree of accuracy for extensive prediction of susceptibility and resistance to 13 anti-tuberculous drugs, directly achievable without culture, which may enable fast, tailored tuberculosis treatment <https://bit.ly/3bAvcAt>

**Cite this article as:** Jouet A, Gaudin C, Badalato N, *et al.* Deep amplicon sequencing for culture-free prediction of susceptibility or resistance to 13 anti-tuberculous drugs. *Eur Respir J* 2021; 57: 2002338 [<https://doi.org/10.1183/13993003.02338-2020>].

This single-page version can be shared freely online.

**ABSTRACT** Conventional molecular tests for detecting *Mycobacterium tuberculosis* complex (MTBC) drug resistance on clinical samples cover a limited set of mutations. Whole-genome sequencing (WGS) typically requires culture.

Here, we evaluated the Deeplex Myc-TB targeted deep-sequencing assay for prediction of resistance to 13 anti-tuberculous drugs/drug classes, directly applicable on sputum.

With MTBC DNA tests, the limit of detection was 100–1000 genome copies for fixed resistance mutations. Deeplex Myc-TB captured *in silico* 97.1–99.3% of resistance phenotypes correctly predicted by WGS from 3651 MTBC genomes. On 429 isolates, the assay predicted 92.2% of 2369 first- and second-line phenotypes, with a sensitivity of 95.3% and a specificity of 97.4%. 56 out of 69 (81.2%) residual discrepancies with phenotypic results involved pyrazinamide, ethambutol and ethionamide, and low-level rifampicin or isoniazid resistance mutations, all notoriously prone to phenotypic testing variability. Only two out of 91 (2.2%) resistance phenotypes undetected by Deeplex Myc-TB had known resistance-associated mutations by WGS analysis outside Deeplex Myc-TB targets. Phenotype predictions from Deeplex Myc-TB analysis directly on 109 sputa from a Djibouti survey matched those of MTBSeq/PhyResSE/Mykrobe, fed with WGS data from subsequent cultures, with a sensitivity of 93.5/98.5/93.1%

and a specificity of 98.5/97.2/95.3%, respectively. Most residual discordances involved gene deletions/indels and 3–12% heteroresistant calls undetected by WGS analysis or natural pyrazinamide resistance of globally rare “*Mycobacterium canettii*” strains then unreported by Deeplex Myc-TB. On 1494 arduous sputa from a Democratic Republic of the Congo survey, 14902 out of 19422 (76.7%) possible susceptible or resistance phenotypes could be predicted culture-free.

Deeplex Myc-TB may enable fast, tailored tuberculosis treatment.
